# Supplementary material
Source: publisher site journal article supplement (https://www.spandidos-publications.com/2904/downloadSupplementary)

Figure S1. Overexpression of NOVA1 in Y79 and WERI-Rb-1 cell lines. The efficiency of overexpression of NOVA1 was verified via (A) reverse transcription-quantitative PCR and (B) western blotting. The data are presented as the mean  $\pm$  SEM from  $\geq 3$  independent experiments. \*\*\* $P < 0.0001$  vs. NC. NC, negative control; NOVA1, neuro-oncological ventral antigen 1.

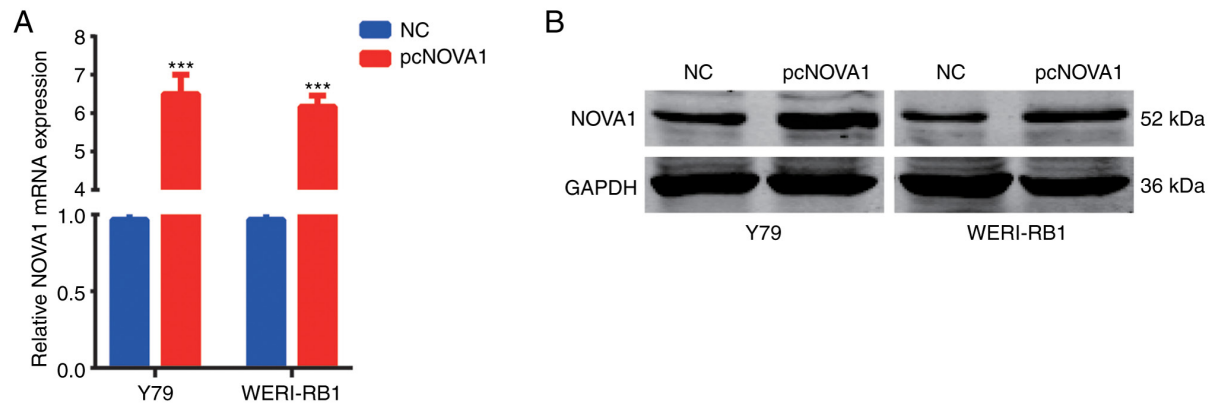

Supplement: Supplementary file 1 [file downloadSupplementary]
